# Supplementary material for: Component-specific, cigarette particle deposition modeling in the human respiratory tract
Source: PubMed Central journal article supplement — Inhal Toxicol. 2013 Dec 11;26(1):36–47. doi: 10.3109/08958378.2013.851305 (PMC3912629; doi:10.3109/08958378.2013.851305), 2013-12-11
Supplement: IHT-26-36-s1.pdf [file IHT-26-36-s1.pdf]

To view the full contents of this document, you need a later version of the PDF viewer. You can upgrade to the latest version of Adobe Reader from [www.adobe.com/products/acrobat/readstep2.html](http://www.adobe.com/products/acrobat/readstep2.html)

For further support, go to [www.adobe.com/support/products/acrreader.html](http://www.adobe.com/support/products/acrreader.html)
